# Supplementary material
Source: publisher figshare collection journal article supplement (https://acs.figshare.com/ndownloader/files/4602961)
Supplement: Supplementary file 1 [file 4602961]

The x-ray diffraction pattern recorded for the iron oxide nanoparticles isolated before functionalization with MOEEAA or citrate is shown in Figure 1. Although the co-precipitation method employed to prepare the particles has been previously reported to yield maghemite ( $\gamma$ -Fe<sub>2</sub>O<sub>3</sub>),<sup>1</sup> the possibility of obtaining mixtures containing residual magnetite (Fe<sub>3</sub>O<sub>4</sub>) has also been noted.<sup>2</sup> Known x-ray diffraction patterns<sup>3</sup> for  $\gamma$ -Fe<sub>2</sub>O<sub>3</sub> and Fe<sub>3</sub>O<sub>4</sub> are thus also shown in Figure 1 for comparison. The position and relative intensities of the diffraction peaks reported in Table 1 indeed indicate that it is very difficult to distinguish between the two forms by this method. Given the oxidizing conditions used in particle preparation, it can be assumed that maghemite ( $\gamma$ -Fe<sub>2</sub>O<sub>3</sub>) is primarily obtained, but the possibility of residual magnetite remaining in the core of the particles cannot be excluded.

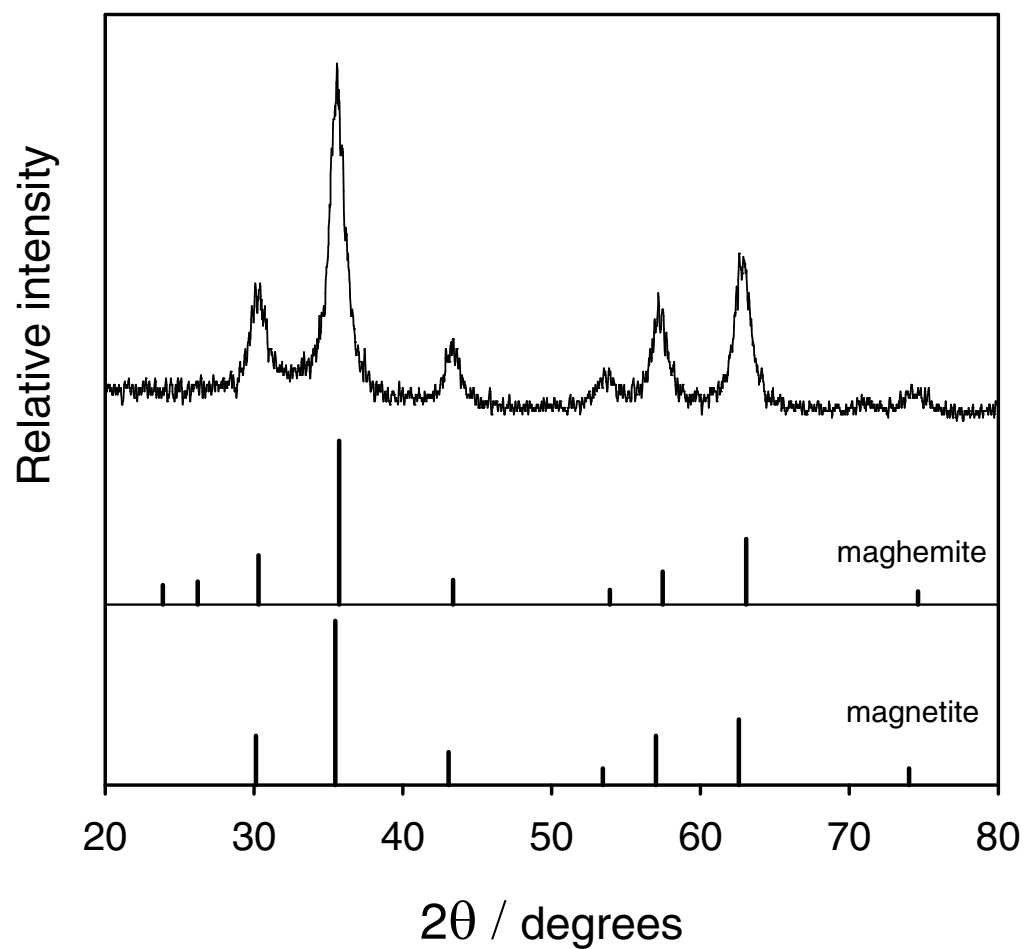

**Figure 1.** X-ray diffraction pattern of synthesized iron oxide nanoparticles compared to literature data<sup>3</sup> for maghemite ( $\gamma$ -Fe<sub>2</sub>O<sub>3</sub>) and magnetite (Fe<sub>3</sub>O<sub>4</sub>).

| Literature data <sup>3</sup>   |     |                         |     |                   |     |
|--------------------------------|-----|-------------------------|-----|-------------------|-----|
| $\gamma\text{-Fe}_2\text{O}_3$ |     | $\text{Fe}_3\text{O}_4$ |     | Experimental data |     |
| $2\theta^\circ$                | I   | $2\theta^\circ$         | I   | $2\theta^\circ$   | I   |
| 23.86                          | 12  | -                       | -   | -                 | -   |
| 26.21                          | 14  | -                       | -   | -                 | -   |
| 30.29                          | 30  | 30.12                   | 30  | 30.24             | 34  |
| 35.72                          | 100 | 35.45                   | 100 | 35.60             | 100 |
| 43.38                          | 15  | 43.06                   | 20  | 43.39             | 22  |
| 53.90                          | 9   | 53.44                   | 10  | 53.52             | 13  |
| 57.45                          | 20  | 56.99                   | 30  | 57.16             | 35  |
| 63.07                          | 40  | 62.57                   | 40  | 62.80             | 47  |
| 74.61                          | 8   | 74.02                   | 10  | 74.16             | 10  |

**Table 1.** X-ray diffraction data for maghemite ( $\gamma\text{-Fe}_2\text{O}_3$ ), magnetite ( $\text{Fe}_3\text{O}_4$ ) and the iron oxide nanoparticles obtained in this study.

---

(1) Bee, A.; Massart, R.; Neveu, S. *J. Magn. Magn. Mater.* **1995**, *149*, 6.

(2) Maity, D.; Agrawal, D. C. *J. Magn. Magn. Mater.* **2007**, *308*, 46.

(3) Cornell, R. M.; Schertmann, U. *The Iron Oxides: Structure, Properties, Reactions, Occurrence and Uses*, VCH Publishers, Weinheim, 2003.
